# Supplementary material for: Reining in BTK: Interdomain Interactions and Their Importance in the Regulatory Control of BTK
Source: Front Cell Dev Biol. 2021 Jun 23;9:655489. doi: 10.3389/fcell.2021.655489 (PMC8260988; doi:10.3389/fcell.2021.655489)
Supplement: Supplementary file 2 [file Table_1.XLSX]

## Sheet: Sheet1
Table 1: Current BTK inhibitors in use or under evaulation, classified by inhibitor binding mode
Covalent, irreversible BTK inhibitors
Inhibitor	Alternate Name(s)	Developer/Affiliation	PDB code bound to BTK KD	Approval/Clinical trial status	Reference	Inhibitor Structure Identifier (CAS No)
Ibrutinib	Imbruvica®, PCI-32765	AbbVie/Janssen	5P9J	FDA approved for CLL, MCL, WM, MZL, and cGVHD; Phase1/2 clinical trials for COVID-19, FL, DLBCL, Glioblastoma	10.1073/pnas.1004594107	936563-96-1
Acalabrutinib	Calquence®, ACP-196	AstraZeneca	Not available	FDA approved for MCL and CLL/SLL; Phase 2 clinical trials for other B cell lymphomas and Covid19	10.1124/jpet.117.242909	1420477-60-6
Zanubrutinib	Brukinsa®, BGB-3111	BeiGene	6J6M	FDA approved for MCL; Phase 2 and 3 clinical trails for other B cell lymphomas	10.1021/acs.jmedchem.9b00687	1691249-45-2
Tirabrutinib	Velexbru, ONO-4059, GS-4059	Gilead Sciences/Ono Pharmaceuticals	5P9M	Phase 1 and 2 clinical trails for RA, B-cell malignancies, Sjogren's Syndrome	10.1182/blood-2015-08-664086	1351636-18-4
Evobrutinib	M2951	Merck	6OMU	Phase 3 for RA and MS	10.1021/acs.jmedchem.9b00794	1415823-73-2
Spebrutinib	CC-292, AVL-292	Celgene	5P9L	Phase 1 for CLL & DLBCL; Phase 2 for RA	10.1124/jpet.113.203489	1202757-89-8
Orelabrutinib	ICP-022	InnoCare	Not available	Phase 1 for CLL, RA; phase 2 for WM, SLE	10.1182/blood-2019-123331	1655504-04-3
Branebrutinib	BMS-986195	Bristol-Myers Squibb	6O81	Phase 2 for RA, SLE, Sjogren's Syndrome	10.1021/acs.jmedchem.9b00167	1912445-55-6
Remibrutinib	LOU064	Novartis	6TFP	Phase 2 for Chronic urticaria and Sjogren's syndrome	10.1021/acs.jmedchem.9b01916	1787294-07-8
Tolebrutinib	SAR442168, PRN2246	Sanofi/Principia	Not available	Phase 3 for MS	NCT04458051 - ClinicalTrials.gov Identifier	1971920-73-6
CNX-774	-	Avila Therapeutics/Celgene	5P9K	Preclinical	CNX-774-Poster2011	1202759-32-7
Poseltinib	HM71224, LY3337641	Hanmi/Eli Lilly	Not available	Did not pass phase 2 clinical trials for RA	10.1186/s13075-017-1402-1	1353552-97-2
M7583	-	Merck Serono	Not available	Phase 1 for B-cell malignancies	10.1182/blood.V130.Suppl_1.3845.3845	Not available
Elsubrutinib	ABBV-105	Abbvie	Not available	Phase 2 for SLE and RA	10.1080/14397595.2018.1484269	1643570-24-4
TG-1701	SHR-1459	TG Therapeutics/Jiangsu HengRui	Not available	Phase 1 for CLL and NHL	10.1158/1538-7445.AM2020-2205	Not available
AC0058	-	Acea Therapeutics	Not available	Phase 1 for SLE and RA	NCT03878303 - ClinicalTrials.gov Identifier	Not available
CHMFL-BTK-01	-		5J87	Preclinical	10.1016/j.ejmech.2017.03.001	2095280-64-9
QL47	-		Not available	Preclinical	10.1021/cb4008524	1469988-75-7
TAS5315	-	Taiho Pharmaceutical	Not available	Phase 2 for RA	10.1136/annrheumdis-2019-eular.1887	Not available
CT-1530	-	Centaurus Biopharma Co., Ltd	Not available	Phase 1/2 for CLL, WM and NHL	NCT02981745 - ClinicalTrials.gov Identifier	Not available
ZYBT1	-	Zydus Research Center	Not available	Preclinical	10.1002/prp2.565	PubChem CID: 118356682
DTRMWXHS-12	DTRM-12	Zhejiang DTRM Biopharma	Not available	Phase 1/2 for CLL, MCL, FL, DLBCL	10.1182/blood-2019-126192	Not available
Covalent, reversible BTK inhibitors
Inhibitor	Alternate Name(s)	Developer/Affiliation	PDB code bound to BTK KD	Approval/Clinical trial status	References	CAS No
Rilzabrutinib	PRN1008	Sanofi/Principia	Not available	Phase 1/2 for Immune Thrombocytopenia, IgG4-related disease and Phase 3 for Pemphigus	10.1111/bcp.13351	1575596-29-0
PRN473	-	Sanofi/Principia	Not available	Phase 1 for Dermatological diseases	10.1111/bph.14090	Not available
PF-06250112	Compound 9a	Pfizer/Principia	6MNY	Preclinical for Lupus	10.1021/acsmedchemlett.8b00461	1609465-89-5
Non-covalent, reversible BTK inhibitors
Inhibitor	Alternate Name(s)	Developer/Affiliation	PDB code bound to BTK KD	Approval/Clinical trial status	References	CAS No
Fenebrutinib	GDC-0853; RG7845	Genentech/Roche	5VFI	Phase 1 for CLL; Phase 2 for SLE & CSU; Phase 3 for MS	10.1021/acs.jmedchem.7b01712	1434048-34-6
CGI1746	-	CGI Pharmaceuticals/Gilead	3OCS	Preclinical	10.1038/nchembio.481	910232-84-7
ARQ 531	-	ArQule/Merck	6E4F	Phase 1/2 for relapsed B-cell lymphomas	10.1182/blood-2019-127260	2095393-15-8
BIIB068	-	Biogen	6W07	Phase 1 for SLE	10.1021/acs.jmedchem.0c00702	1798787-27-5
BMS-935177	-	Bristol-Myers Squibb	5JRS	Preclinical	10.1021/acs.jmedchem.6b00722	1231889-53-4
BMS-986142	-	Bristol-Myers Squibb	5T18	Phase 2 for RA and Sjogren's syndrome	10.1007/s00228-017-2226-2	1643368-58-4
PCI-29732	-	Pharmacyclics/AbbVie	Not available	Preclinical	10.1159/000492647	330786-25-9
Vecabrutinib	SNS-062	Sunesis	Not available	Did not advance to phase 2 clinical trials	10.1158/1538-7445.AM2017-1207	1510829-06-7
RN486	-	Hoffmann-La Roche	5P9G	Preclinical	10.1021/jm500305p	1242156-23-5
BIIB091	-	Biogen	Not available	Phase 1 for MS	NCT03943056 - ClinicalTrials.gov Identifier	Not available
LOXO-305	-	Loxo Oncology, Inc./Lilly	Not available	Phase 1/2 for CLL/SLL, NHL	10.1182/blood-2020-134314	Not available
Proteolysis targeting chimeras (PROTACs) for BTK degradation
Inhibitor	Alternate Name(s)	Developer/Affiliation	PDB code bound to BTK KD	Approval/Clinical trial status	References	CAS No
SJF620	-	Yale University	Not available	Preclinical	10.1016/j.bmcl.2019.126877	2376187-16-3
MT-802	-	Yale University	Not available	Preclinical	10.1021/acs.biochem.8b00391	2231744-29-7
NX-5948	-	Nurix Therapeutics	Not available	Preclinical	NX5943-NurixPipeline	Not available
DD-03-171	-	Harvard University	Not available	Preclinical	10.1182/blood-2018-07-862953	2366132-45-6
Abbreviations used
KD	Kinase domain
CLL	Chronic lymphocytic leukemia
SLL	Small lymphocytic leukemia
MCL	Mantle cell lymphoma
WM	Waldenström's macroglobulinemia
MZL	Marginal zone lymphoma
cGVHD	chronic Graft versus host disease
FL	Follicular lymphoma
DLBCL	Diffuse large B-cell lymphoma
RA	Rheumatoid Arthritis
MS	Multiple Sclerosis
SLE	Systemic Lupus Erythematosus
NHL	Non-Hodgkins Lymphoma
CSU	Chronic Spontaneous Urticaria
PDB code	Protein Data Bank code
